# Supplementary material
Source: Springer Nature journal article supplement (https://www.springermedizin.de/resource/supplementary/12962_2013_184_MOESM4_ESM.pdf/9571858)

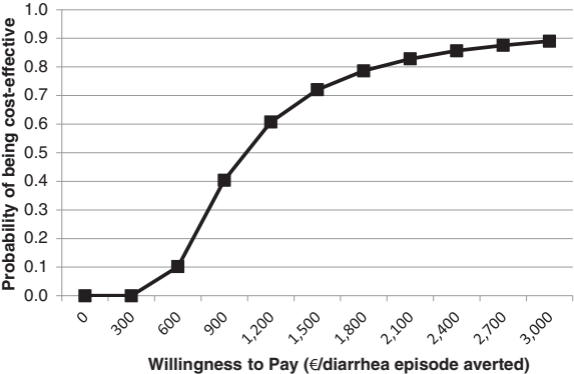

Supplement: MOESM4 [file 9571858]
